# Supplementary material for: CO substitution by PPh3 in Fe2S2(CO)6 proceeds via a novel Fe2S intermediate
Source: Royal Society of Chemistry journal article supplement (doi:10.1039/d1cc00956g), 2021-01-01
Supplement: d1cc00956g1.pdf [file d1cc00956g1.pdf]

## Supporting Information

# CO Substitution by PPh<sub>3</sub> in Fe<sub>2</sub>S<sub>2</sub>(CO)<sub>6</sub> Proceeds via a Novel Fe<sub>2</sub>S Intermediate

Fanjun Zhang,<sup>a,b\*</sup> Toby J. Woods,<sup>b</sup> Thomas B. Rauchfuss<sup>b\*</sup>, Federica Arrigoni,<sup>c</sup> and Giuseppe Zampella<sup>c\*</sup>

<sup>a</sup> School of Chemistry and Chemical Engineering, Qufu Normal University, Qufu, Shandong 273165, China

<sup>b</sup> School of Chemical Sciences, University of Illinois at Urbana-Champaign, Urbana, IL 61801, USA

<sup>c</sup> Department of Biotechnology and Biosciences, University of Milano-Bicocca, Piazza della Scienza 2 20126-Milan, Italy

## Table of Contents

|                                                                                                                                                                                                                                  |               |
|----------------------------------------------------------------------------------------------------------------------------------------------------------------------------------------------------------------------------------|---------------|
| <b>I. General Information</b> .....                                                                                                                                                                                              | <b>S3</b>     |
| <b>II. Preparation, Characterization and Reactions of Fe<sub>2</sub>S(CO)<sub>6</sub>(PPh<sub>3</sub>)<sub>2</sub></b> .....                                                                                                     | <b>S4-S25</b> |
| Synthesis of Fe <sub>2</sub> S(CO) <sub>6</sub> (PPh <sub>3</sub> ) <sub>2</sub> ( <b>4</b> ) and reaction with S=PPh <sub>3</sub> .....                                                                                         | S4            |
| Synthesis of [Fe <sub>2</sub> SH(CO) <sub>6</sub> (PPh <sub>3</sub> ) <sub>2</sub> ]OTf ([H <b>4</b> ]OTf) and [Fe <sub>2</sub> SMe(CO) <sub>6</sub> (PPh <sub>3</sub> ) <sub>2</sub> ]OTf<br>([Me <b>4</b> ]OTf) .....          | S5            |
| <b>Figure S1.</b> IR spectrum of Fe <sub>2</sub> (μ-S)(CO) <sub>6</sub> (PPh <sub>3</sub> ) <sub>2</sub> ( <b>4</b> ) in THF solution .....                                                                                      | S6            |
| <b>Figure S2.</b> <sup>31</sup> P NMR spectrum of Fe <sub>2</sub> (μ-S)(CO) <sub>6</sub> (PPh <sub>3</sub> ) <sub>2</sub> ( <b>4</b> ) in CD <sub>2</sub> Cl <sub>2</sub> solution .....                                         | S7            |
| <b>Figure S3.</b> <sup>1</sup> H NMR spectrum of Fe <sub>2</sub> (μ-S)(CO) <sub>6</sub> (PPh <sub>3</sub> ) <sub>2</sub> ( <b>4</b> ) in CD <sub>2</sub> Cl <sub>2</sub> solution .....                                          | S8            |
| <b>Figure S4.</b> HR-ESI spectrum of Fe <sub>2</sub> (μ-S)(CO) <sub>6</sub> (PPh <sub>3</sub> ) <sub>2</sub> ( <b>4</b> ) in THF solution .....                                                                                  | S9            |
| <b>Figure S5.</b> <sup>31</sup> P NMR spectrum of Fe <sub>2</sub> (μ-S)(CO) <sub>6</sub> (PPh <sub>3</sub> ) <sub>2</sub> + S=PPh <sub>3</sub> (1 : 1) in THF<br>solution vs time at rt .....                                    | S10           |
| <b>Figure S6.</b> <sup>31</sup> P NMR spectrum of Fe <sub>2</sub> (μ-S)(CO) <sub>6</sub> (PPh <sub>3</sub> ) <sub>2</sub> + S=P(C <sub>6</sub> H <sub>4</sub> -4-Cl) <sub>3</sub> (1 : 1) in<br>THF solution vs time at rt. .... | S11           |
| <b>Figure S7.</b> <sup>31</sup> P NMR spectrum of Fe <sub>2</sub> (μ-S)(CO) <sub>6</sub> (PPh <sub>3</sub> ) <sub>2</sub> + S=P(C <sub>6</sub> H <sub>4</sub> -4-Cl) <sub>3</sub> (1 : 1) in<br>THF solution for 2 h at rt ..... | S12           |

|                                                                                                                                                                                                                                                                                                                                   |                |
|-----------------------------------------------------------------------------------------------------------------------------------------------------------------------------------------------------------------------------------------------------------------------------------------------------------------------------------|----------------|
| <b>Figure S8.</b> $^{31}\text{P}$ NMR spectrum of $\text{Fe}_2(\mu\text{-S}_2)(\text{CO})_4(\text{PPh}_3)_2 + \text{P}(\text{C}_6\text{H}_4\text{-4-Cl})_3$ (1 : 1) in THF solution vs t at rt. ....                                                                                                                              | S13            |
| <b>Figure S9.</b> Exemplified $^{31}\text{P}$ NMR spectrum of $\text{Fe}_2(\mu\text{-S}_2)(\text{CO})_4(\text{PPh}_3)_2 + \text{P}(\text{C}_6\text{H}_4\text{-4-Cl})_3$ in THF after 2 days and $\text{Fe}_2(\mu\text{-S})(\text{CO})_6(\text{PPh}_3)_2 + \text{SP}(\text{C}_6\text{H}_4\text{-4-Cl})_3$ in THF for 2 hours ..... | S14            |
| <b>Figure S10.</b> Degradation of $\text{Fe}_2(\mu\text{-S})(\text{CO})_6(\text{PPh}_3)_2$ ( <b>4</b> ) in THF detected by $^{31}\text{P}$ NMR .....                                                                                                                                                                              | S15            |
| <b>Figure S11.</b> Degradation of $\text{Fe}_2(\mu\text{-S})(\text{CO})_6(\text{PPh}_3)_2$ ( <b>4</b> ) in $\text{CH}_2\text{Cl}_2$ detected by $^{31}\text{P}$ NMR .....                                                                                                                                                         | S16            |
| <b>Figure S12.</b> $^1\text{H}$ NMR spectrum of $[\text{Fe}_2(\mu\text{-SH})(\text{CO})_6(\text{PPh}_3)_2]\text{OTf}$ ( <b>[H4]OTf</b> ) in $\text{CD}_2\text{Cl}_2$ solution .....                                                                                                                                               | S17            |
| <b>Figure S13.</b> $^{31}\text{P}$ NMR spectrum of $[\text{Fe}_2(\mu\text{-SH})(\text{CO})_6(\text{PPh}_3)_2]\text{OTf}$ ( <b>[H4]OTf</b> ) in $\text{CD}_2\text{Cl}_2$ solution .....                                                                                                                                            | S18            |
| <b>Figure S14.</b> IR spectrum of $[\text{Fe}_2(\mu\text{-SH})(\text{CO})_6(\text{PPh}_3)_2]\text{OTf}$ ( <b>[H4]OTf</b> ) in $\text{CH}_2\text{Cl}_2$ solution .....                                                                                                                                                             | S19            |
| <b>Figure S15.</b> ORTEP of the $[\text{Fe}_2(\mu\text{-SH})(\text{CO})_6(\text{PPh}_3)_2]\text{OTf}$ ( <b>[H4]OTf</b> ) .....                                                                                                                                                                                                    | S20            |
| <b>Figure S16.</b> IR spectrum of $[\text{Fe}_2(\mu\text{-SMe})(\text{CO})_6(\text{PPh}_3)_2]\text{OTf}$ ( <b>[Me4]OTf</b> ) in $\text{CH}_2\text{Cl}_2$ solution .....                                                                                                                                                           | S21            |
| <b>Figure S17.</b> $^1\text{H}$ NMR spectrum of $[\text{Fe}_2(\mu\text{-SMe})(\text{CO})_6(\text{PPh}_3)_2]\text{OTf}$ ( <b>[Me4]OTf</b> ) in $\text{CD}_2\text{Cl}_2$ solution.....                                                                                                                                              | S22            |
| <b>Figure S18.</b> $^{31}\text{P}$ NMR spectrum of $[\text{Fe}_2(\mu\text{-SMe})(\text{CO})_6(\text{PPh}_3)_2]\text{OTf}$ ( <b>[Me4]OTf</b> ) in $\text{CD}_2\text{Cl}_2$ solution.....                                                                                                                                           | S23            |
| <b>Figure S19.</b> ORTEP of the $[\text{Fe}_2(\mu\text{-SMe})(\text{CO})_6(\text{PPh}_3)_2]\text{OTf}$ ( <b>[Me4]OTf</b> ) .....                                                                                                                                                                                                  | S24            |
| <b>Figure S20.</b> Cyclic voltammogram of <b>4</b> , <b>[H4]OTf</b> and <b>[Me4]OTf</b> in $\text{CH}_2\text{Cl}_2$ .....                                                                                                                                                                                                         | S25            |
| <b>III. Crystallography</b> .....                                                                                                                                                                                                                                                                                                 | <b>S26</b>     |
| <b>IV. DFT Calculation</b> .....                                                                                                                                                                                                                                                                                                  | <b>S27-S37</b> |

## I. General Information

Manipulations were conducted using standard Schlenk-line techniques or an MBraun glovebox under N<sub>2</sub> atmosphere. Solvents were deoxygenated by N<sub>2</sub> sparging and purified by passage through an activated alumina column using solvent purification system. <sup>1</sup>H (500 MHz) and <sup>31</sup>P{<sup>1</sup>H} (202 MHz) NMR spectra were recorded on Varian VXR500 or U500 spectrometer. Chemical shifts (δ/ppm) were referenced to residual solvent peaks (for <sup>1</sup>H) or external 85% H<sub>3</sub>PO<sub>4</sub> (for <sup>31</sup>P). Solution IR spectra were recorded on a PerkinElmer Spectrum 100 FTIR spectrometer. Elemental analysis was performed utilizing an Exeter CE-440 elemental Analyzer. A Waters Micromass Quattro II spectrometer was used to acquire ESI-MS data for analytes. Crystallographic data were collected using a Siemens SMART diffractometer equipped with a Mo Kα source (λ = 0.71073 Å) and an Apex II detector. All chemicals were purchased from commercial sources and used without further purification. CD<sub>2</sub>Cl<sub>2</sub> was degassed by three times freeze-pump-thaw and dried using 4Å molecular sieves. Fe<sub>2</sub>(μ-S)<sub>2</sub>(CO)<sub>6</sub> were prepared according to the literature methods.<sup>1</sup>

## References

1. a) Bogan, L. E.; Lesch, D. A.; Rauchfuss, T. B. Synthesis of Heterometallic Cluster Compounds from Fe<sub>3</sub>(μ<sub>3</sub>-Te)<sub>2</sub>(CO)<sub>9</sub> and Comparisons with Analogous Sulfide Clusters. *J. Organomet. Chem.* 1983, 250, 429–438; b) Seyferth, D.; Henderson, R. S.; Song, L.-C. Chemistry of μ-Dithio-bis(tricarbonyliron), a Mimic of Inorganic Disulfides. 1. Formation of Di-μ-thiolato-bis(tricarbonyliron) Dianion. *Organometallics* 1982, 1, 125–133.

## II. Preparation, Characterization and Reactivities

**Reaction of  $\text{Fe}_2(\mu\text{-S})_2(\text{CO})_6$  with 2 equivalents of  $\text{PPh}_3$ .**  $\text{Fe}_2(\mu\text{-S})_2(\text{CO})_6$  (35 mg, 0.1 mmol) and  $\text{PPh}_3$  (53 mg, 0.2 mmol) were dissolved in 5 mL THF in a vial under  $\text{N}_2$ . It was stirred at rt and detected by  $^{31}\text{P}$  NMR, which show full conversion of  $\text{Fe}_4\text{S}_3(\text{CO})_8(\text{PPh}_3)_3$  after 4 h, gave  $\text{Fe}_2(\mu\text{-S}_2)(\text{CO})_4(\text{PPh}_3)_2$  as the product. The yield was determined to be 54% using  $\text{O}=\text{PPh}_3$  as internal standard.

**$\text{Fe}_2(\mu\text{-S})(\text{CO})_6(\text{PPh}_3)_2$  (4).**  $\text{Fe}_2(\mu\text{-S}_2)(\text{CO})_6$  (150 mg, 0.44 mmol) and  $\text{PPh}_3$  (229 mg, 0.87 mmol) were dissolved in 5 mL THF ( $-30\text{ }^\circ\text{C}$ ) in a vial under  $\text{N}_2$ . Then 20 mL hexanes was layered on top of the solution, and the vial was kept at  $-30\text{ }^\circ\text{C}$  for 2 days to gave red precipitates. It was filtered, washed with hexanes for 3 times and dried under vacuum.  $\text{Fe}_2\text{S}(\text{CO})_6(\text{PPh}_3)_2$  was obtained as red microcrystals in the yield of 59% (215 mg).  $^1\text{H}$  NMR (600 MHz,  $\text{CD}_2\text{Cl}_2$ ):  $\delta$  7.62, m, 7.46, m.  $^{31}\text{P}$  NMR (202 MHz):  $\delta$  64.9. IR (THF):  $\nu_{\text{CO}}$  = 2033 w, 1971 vs, 1950 sh, 1915 w. Anal. Calcd for  $[\text{C}_{42}\text{H}_{30}\text{Fe}_2\text{O}_6\text{P}_2\text{S} + \text{THF}]$ : C, 60.82; H, 4.22; Found: C, 60.87; H, 3.91; ESI-MS  $m/z$  calcd for  $[\text{Fe}_2\text{S}(\text{CO})_6(\text{PPh}_3)_2 + \text{H}^+]$ , 837.0015. Found, 837.0038. Single crystals suitable for X-ray diffraction study were grown by slow diffusion of pentane into a THF solution at  $-30\text{ }^\circ\text{C}$ .

**Reaction of  $\text{Fe}_2(\mu\text{-S})(\text{CO})_6(\text{PPh}_3)_2$  with 1 equivalent of  $\text{S}=\text{PPh}_3$ .**  $\text{Fe}_2(\mu\text{-S})(\text{CO})_6(\text{PPh}_3)_2$  (26 mg, 0.03 mmol) and  $\text{S}=\text{PPh}_3$  (9.0 mg, 0.03 mmol) were dissolved in 2 mL THF in a vial under  $\text{N}_2$ . It was stirred at rt and detected by  $^{31}\text{P}$  NMR, which show full conversion of  $\text{Fe}_2(\mu\text{-S})(\text{CO})_6(\text{PPh}_3)_2$  and  $\text{S}=\text{PPh}_3$  after 2 h, gave  $\text{Fe}_2(\mu\text{-S}_2)(\text{CO})_4(\text{PPh}_3)_2$  as the product. The yield was determined to be 66% using  $\text{O}=\text{PPh}_3$  as internal standard.

**Protonation of  $\text{Fe}_2(\mu\text{-S})(\text{CO})_6(\text{PPh}_3)_2$  with HOTf.**  $\text{Fe}_2(\mu\text{-S})(\text{CO})_6(\text{PPh}_3)_2$  (51 mg, 0.06 mmol) in 2 mL  $\text{CH}_2\text{Cl}_2$  was treated with HOTf (9.2 mg, 0.06 mmol) at rt. After stirring for 20 min, 20 mL pentane was added to give red precipitates. It was filtered, washed with pentane and dried under vacuum. Recrystallization from  $\text{CH}_2\text{Cl}_2$ /pentane gave  $[\text{Fe}_2(\mu\text{-SH})(\text{CO})_6(\text{PPh}_3)_2]\text{OTf}$  (**[H4]OTf**) as red solid in the yield of 78% (47 mg).  $^1\text{H}$  NMR (500 MHz,  $\text{CD}_2\text{Cl}_2$ ):  $\delta$  7.63-7.59 (m, 30 H), 1.96 (s, 1H).  $^{31}\text{P}$  NMR (202 MHz):  $\delta$  51.8. ESI-MS  $m/z$  calcd for  $[\text{Fe}_2\text{SH}(\text{CO})_6(\text{PPh}_3)_2]^+$ , 837.0; Found, 836.9. IR ( $\text{CH}_2\text{Cl}_2$ ):  $\nu_{\text{CO}}$  = 2089 w, 2046w, 2023 vs. Anal. Calcd for  $[\text{C}_{43}\text{H}_{31}\text{F}_3\text{Fe}_2\text{O}_9\text{P}_2\text{S}_2 + \text{CH}_2\text{Cl}_2]$ : C, 49.33; H, 3.10; Found: C, 49.6; H, 3.41. Single crystals suitable for X-ray diffraction study were grown by slow diffusion of pentane into a  $\text{CH}_2\text{Cl}_2$  solution at  $-30^\circ\text{C}$ .

**Methylation of  $\text{Fe}_2(\mu\text{-S})(\text{CO})_6(\text{PPh}_3)_2$  with MeOTf.**  $\text{Fe}_2(\mu\text{-S})(\text{CO})_6(\text{PPh}_3)_2$  (34 mg, 0.04 mmol) in 2 mL  $\text{CH}_2\text{Cl}_2$  was treated with MeOTf (6.6 mg, 0.04 mmol) at rt. The mixture was stirred at rt for 20 min and filtered through a short pad of celite. 10 mL pentane was added to precipitate the product as red solid. Recrystallization from  $\text{CH}_2\text{Cl}_2$ /diethyl ether gave  $[\text{Fe}_2(\mu\text{-SMe})(\text{CO})_6(\text{PPh}_3)_2]\text{OTf}$  (**[Me4]OTf**) as microcrystals in the yield of 86% (36 mg).  $^1\text{H}$  NMR (500 MHz,  $\text{CD}_2\text{Cl}_2$ ):  $\delta$  7.65-7.60 (m, 30 H), 1.10 (s, 3H).  $^{31}\text{P}$  NMR (202 MHz):  $\delta$  50.9. ESI-MS  $m/z$  calcd for  $[\text{Fe}_2\text{SMe}(\text{CO})_6(\text{PPh}_3)_2]^+$ , 851.0; Found, 850.9. IR ( $\text{CH}_2\text{Cl}_2$ ):  $\nu_{\text{CO}}$  = 2085 w, 2042 w, 2019 vs. Anal. Calcd for  $\text{C}_{44}\text{H}_{33}\text{F}_3\text{Fe}_2\text{O}_9\text{P}_2\text{S}_2$ : C, 52.82; H, 3.32; Found: C, 52.48; H, 3.25. Single crystals suitable for X-ray diffraction study were grown by slow diffusion of diethyl ether into a  $\text{CH}_2\text{Cl}_2$  solution at  $-30^\circ\text{C}$ .

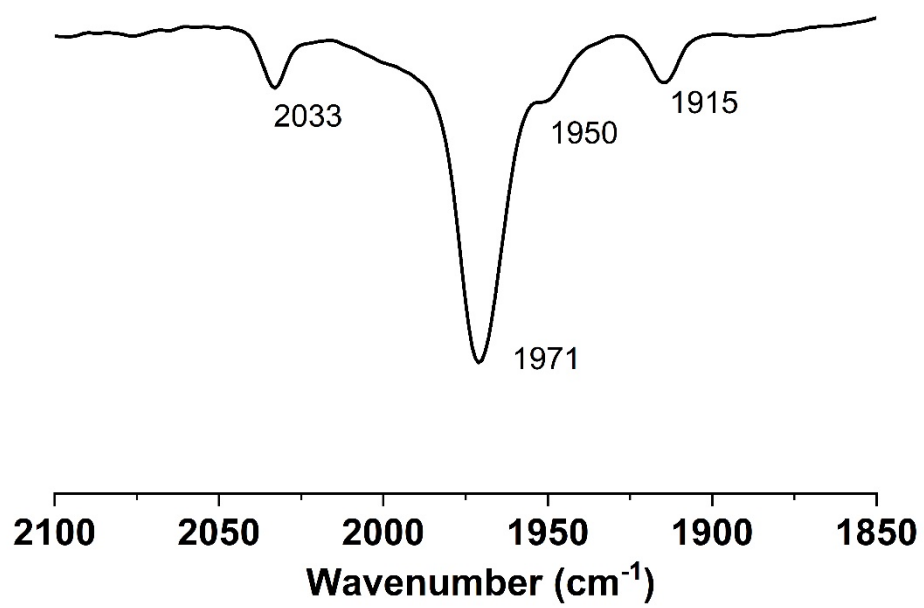

**Figure S1.** IR spectrum of  $\text{Fe}_2(\mu\text{-S})(\text{CO})_6(\text{PPh}_3)_2$  (**4**) in THF solution.

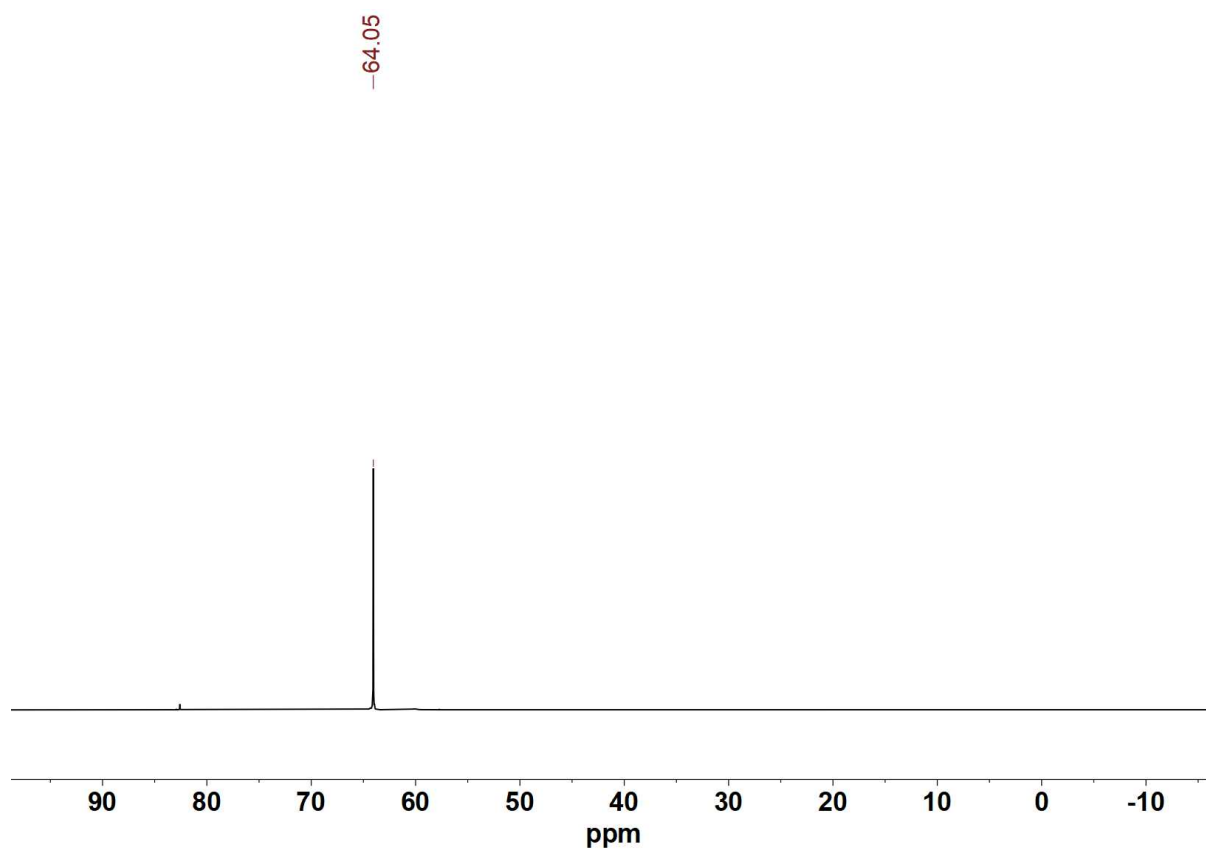

**Figure S2.**  $^{31}\text{P}$  NMR spectrum of  $\text{Fe}_2(\mu\text{-S})(\text{CO})_6(\text{PPh}_3)_2$  (**4**) in  $\text{CD}_2\text{Cl}_2$  solution.

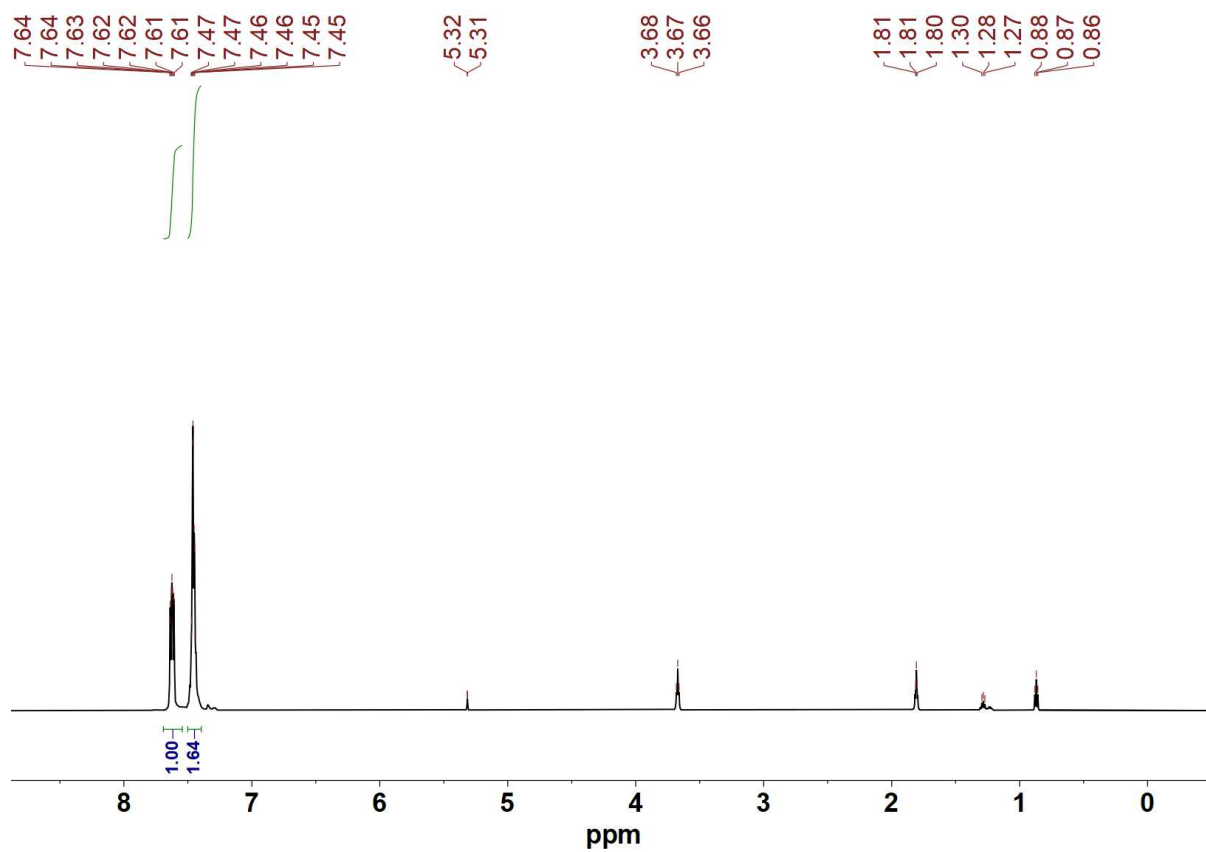

**Figure S3.**  $^1\text{H}$  NMR spectrum of  $\text{Fe}_2(\mu\text{-S})(\text{CO})_6(\text{PPh}_3)_2$  (**4**) in  $\text{CD}_2\text{Cl}_2$  solution.

*Assignment:* THF ( $\delta$  3.67, 1.81), pentane ( $\delta$  1.28, 0.87).



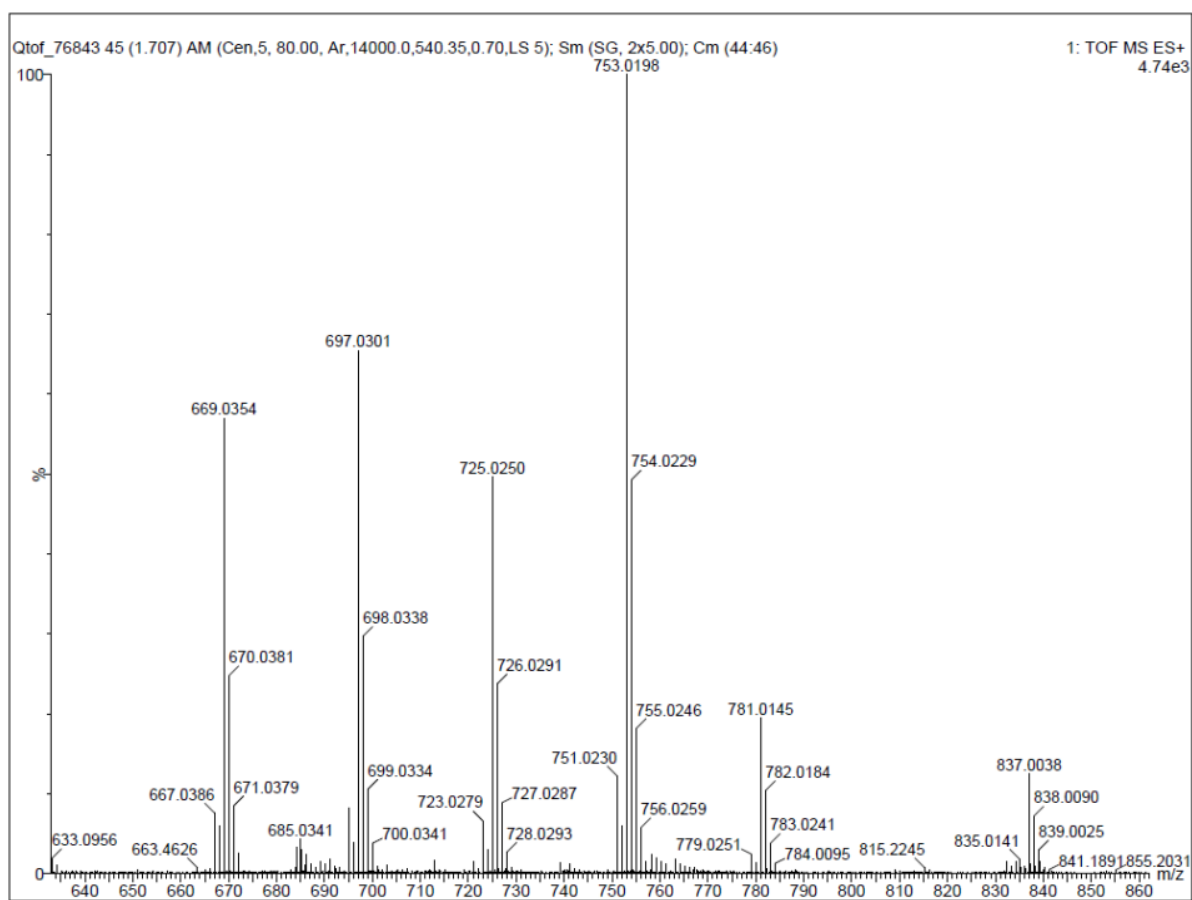

**Figure S4.** HR-ESI spectrum of  $\text{Fe}_2(\mu\text{-S})(\text{CO})_6(\text{PPh}_3)_2$  (**4**) in THF solution.

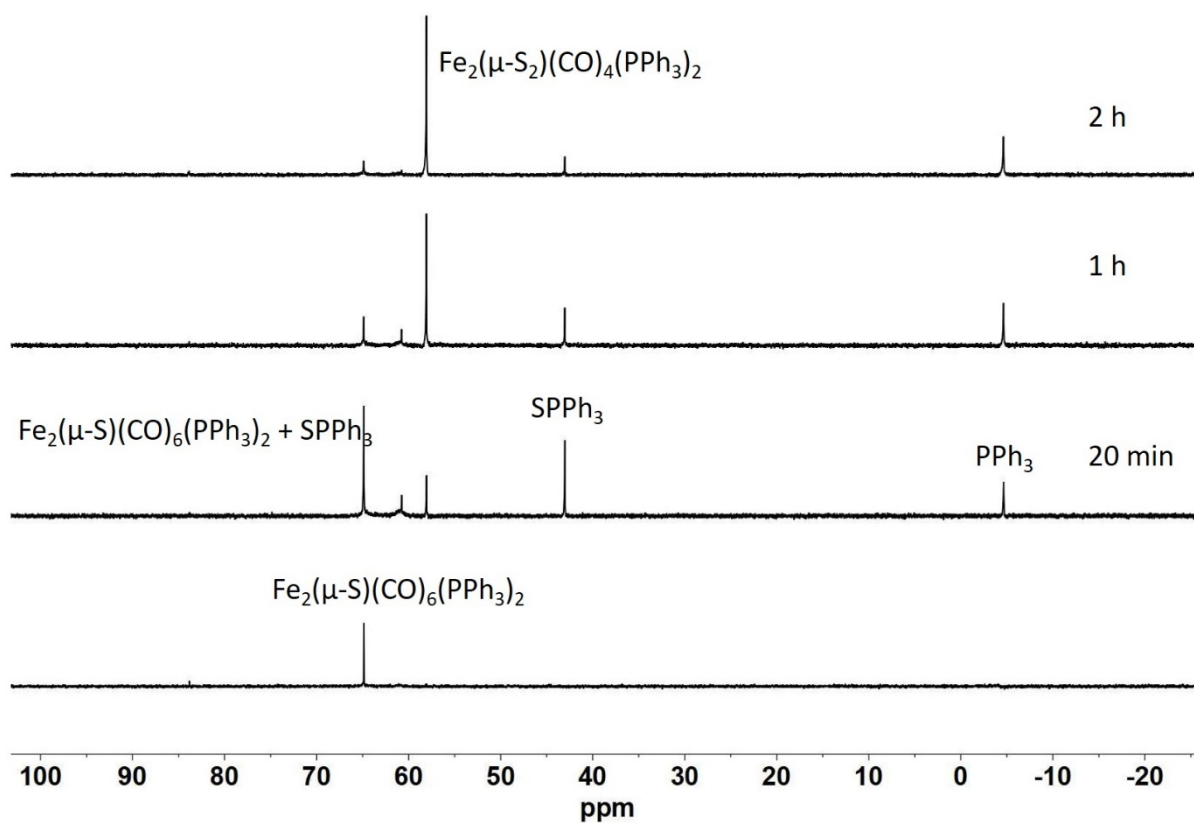

**Figure S5.**  $^{31}\text{P}$  NMR spectrum of  $\text{Fe}_2(\mu\text{-S})(\text{CO})_6(\text{PPh}_3)_2 + \text{S}=\text{PPh}_3$  (1 : 1) in THF solution vs time at rt.

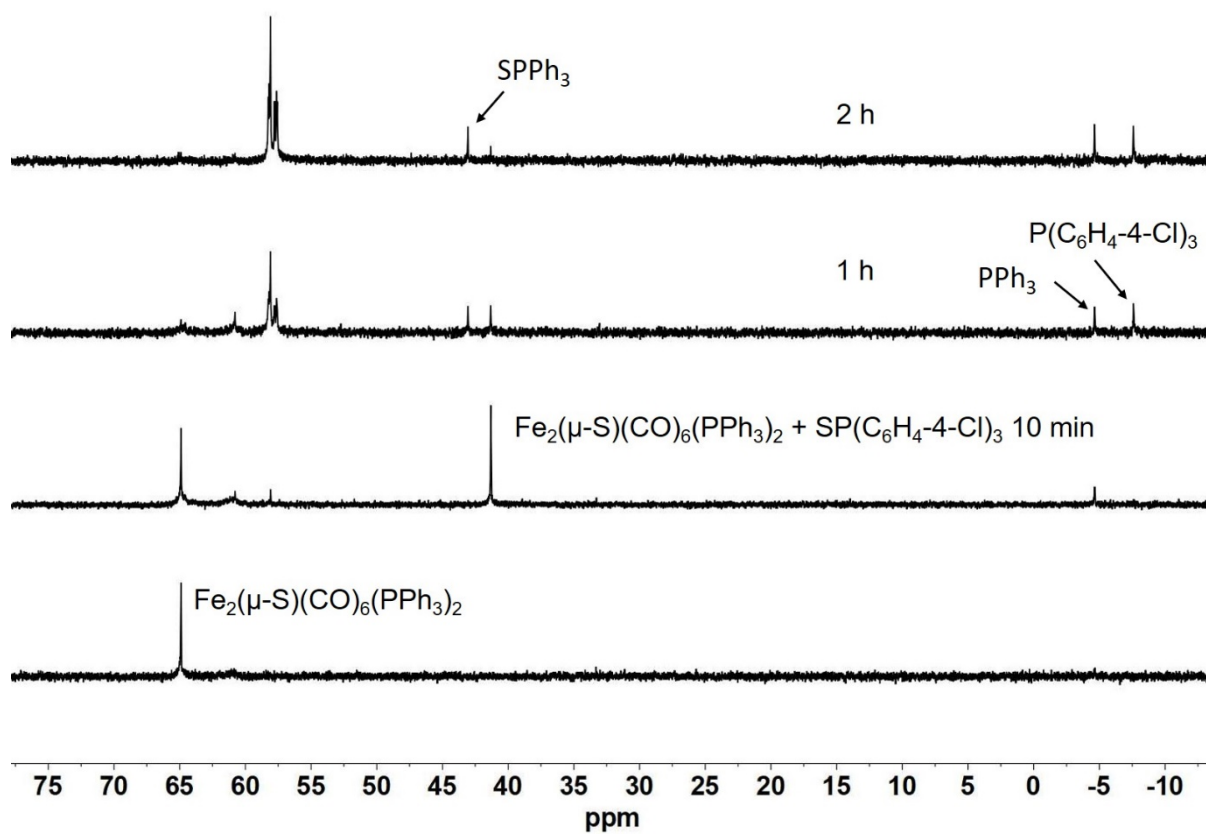

**Figure S6.**  $^{31}\text{P}$  NMR spectrum of  $\text{Fe}_2(\mu\text{-S})(\text{CO})_6(\text{PPh}_3)_2 + \text{S}=\text{P}(\text{C}_6\text{H}_4\text{-4-Cl})_3$  (1 : 1) in THF solution vs time at rt.

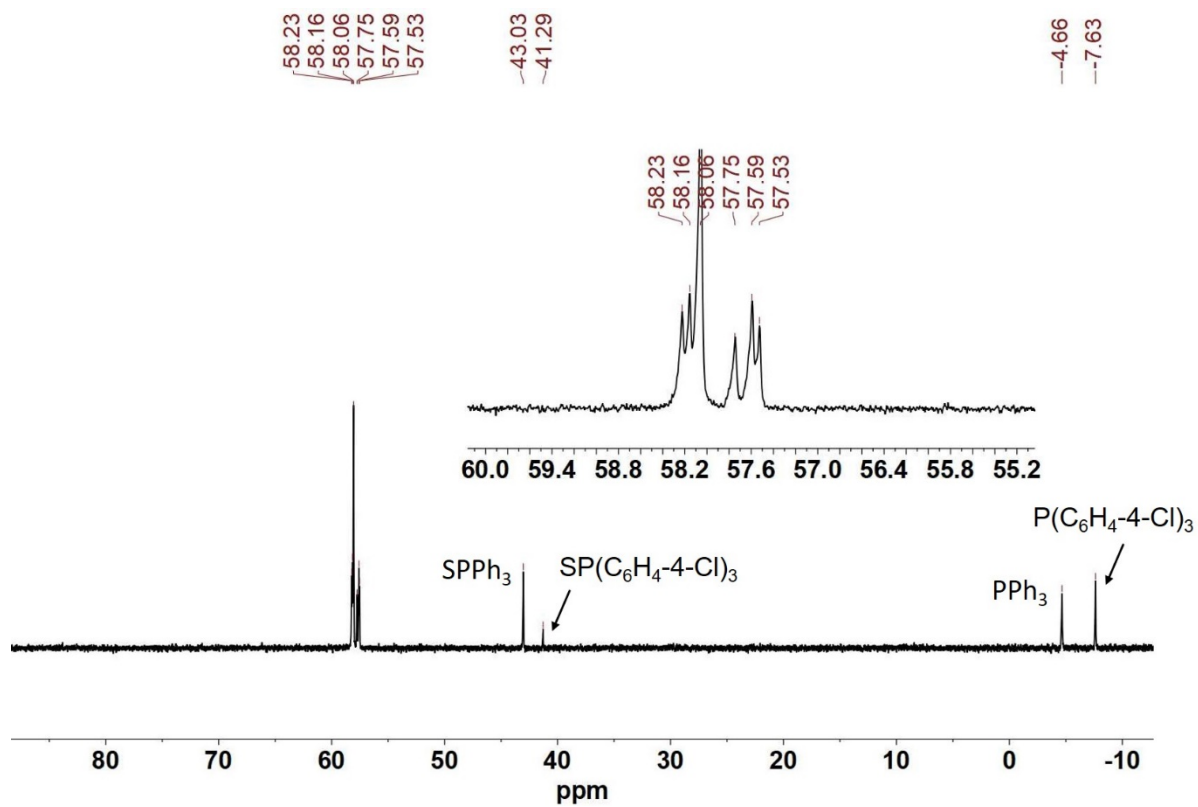

**Figure S7.**  $^{31}\text{P}$  NMR spectrum of  $\text{Fe}_2(\mu\text{-S})(\text{CO})_6(\text{PPh}_3)_2 + \text{S}=\text{P}(\text{C}_6\text{H}_4\text{-4-Cl})_3$  (1 : 1) in THF solution for 2 h at rt.

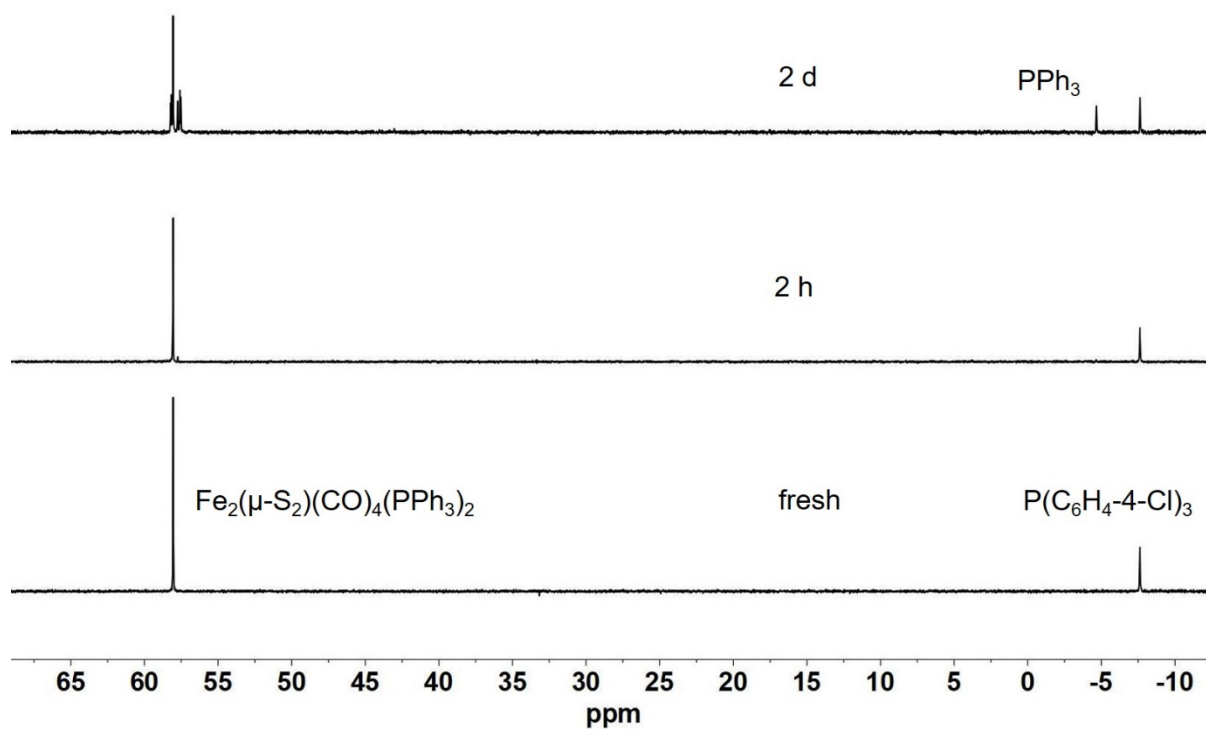

**Figure S8.**  $^{31}\text{P}$  NMR spectrum of  $\text{Fe}_2(\mu\text{-S}_2)(\text{CO})_4(\text{PPh}_3)_2 + \text{P}(\text{C}_6\text{H}_4\text{-4-Cl})_3$  (1 : 1) in THF solution vs t at rt.

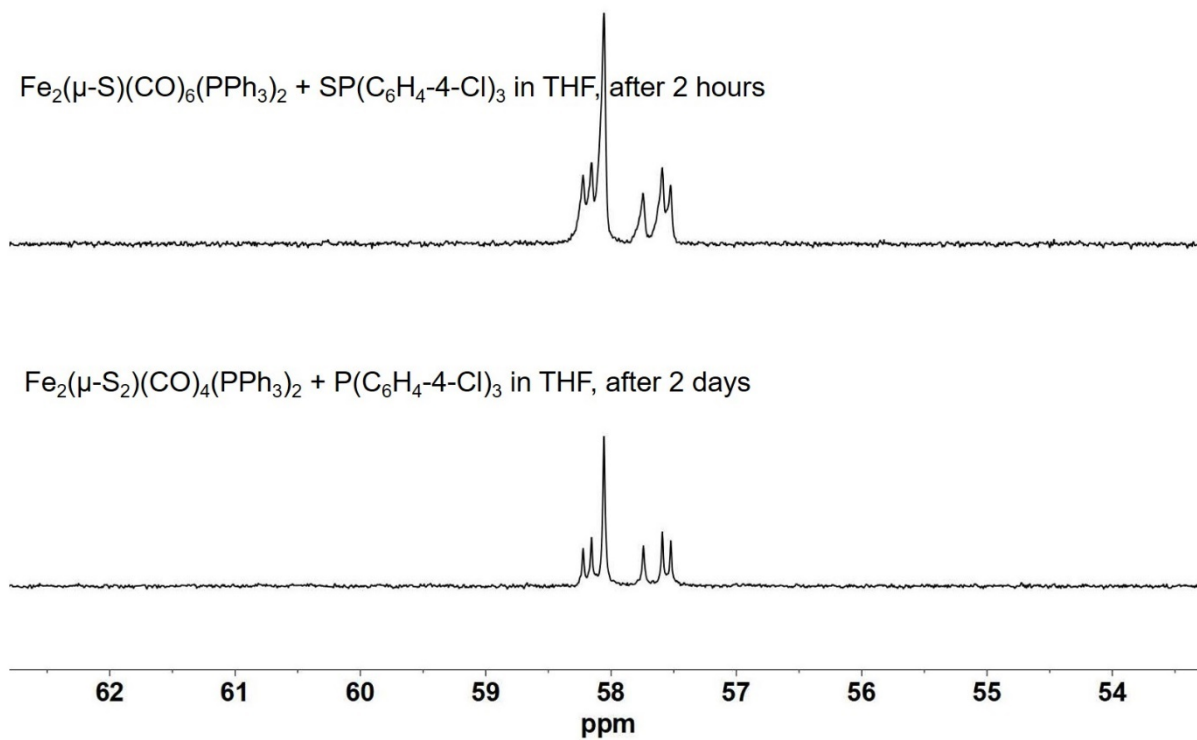

**Figure S9.** Exemplified  $^{31}\text{P}$  NMR spectrum of  $\text{Fe}_2(\mu\text{-S}_2)(\text{CO})_4(\text{PPh}_3)_2 + \text{P}(\text{C}_6\text{H}_4\text{-4-Cl})_3$  in THF after 2 days and  $\text{Fe}_2(\mu\text{-S})(\text{CO})_6(\text{PPh}_3)_2 + \text{SP}(\text{C}_6\text{H}_4\text{-4-Cl})_3$  in THF for 2 hours.

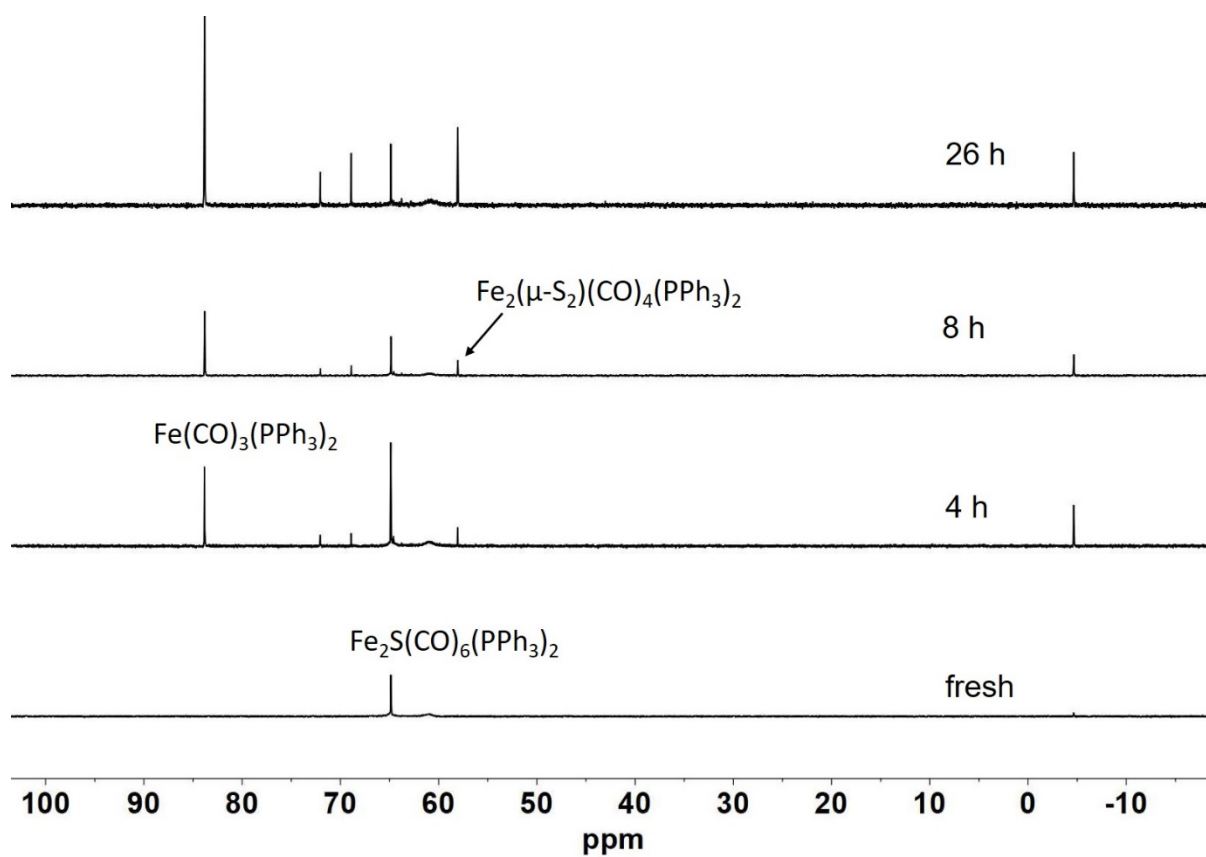

**Figure S10.**  $^{31}\text{P}$  NMR spectrum of  $\text{Fe}_2(\mu\text{-S})(\text{CO})_6(\text{PPh}_3)_2$  (**4**) in THF solution vs time.

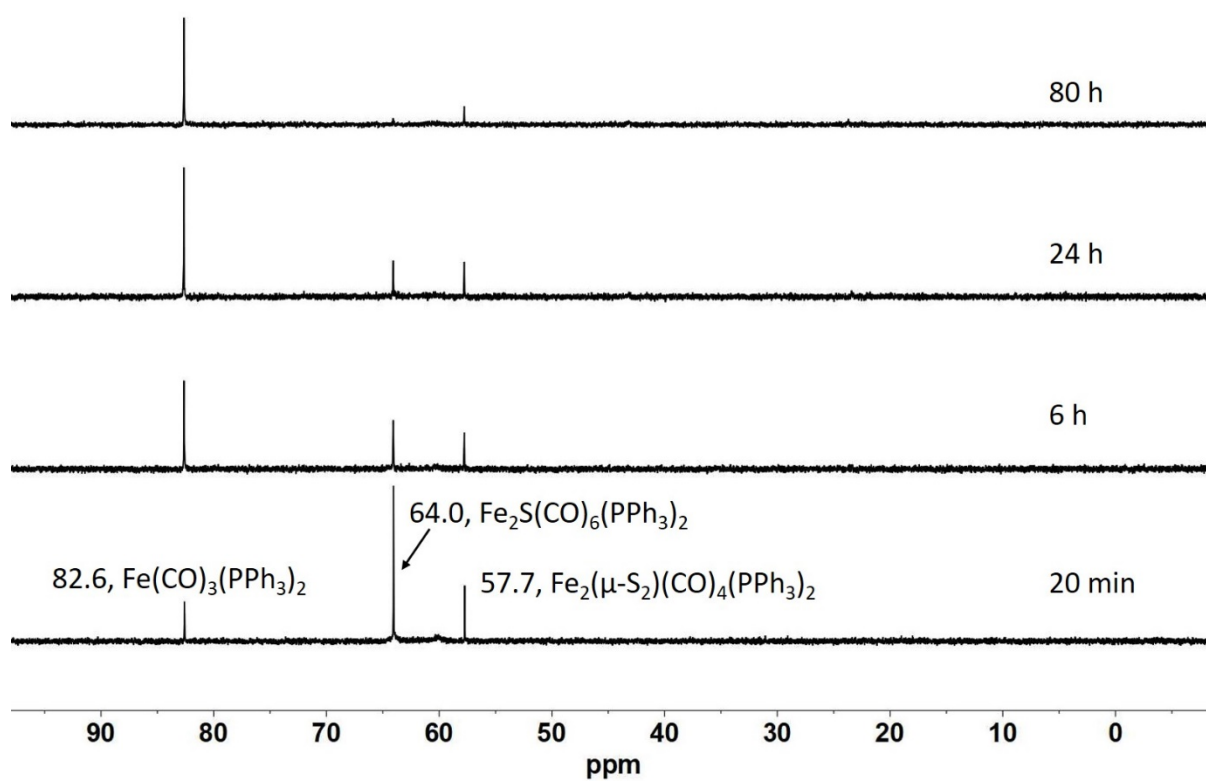

**Figure S11.**  $^{31}\text{P}$  NMR spectrum of  $\text{Fe}_2(\mu\text{-S})(\text{CO})_6(\text{PPh}_3)_2$  (**4**) in  $\text{CH}_2\text{Cl}_2$  solution vs time.



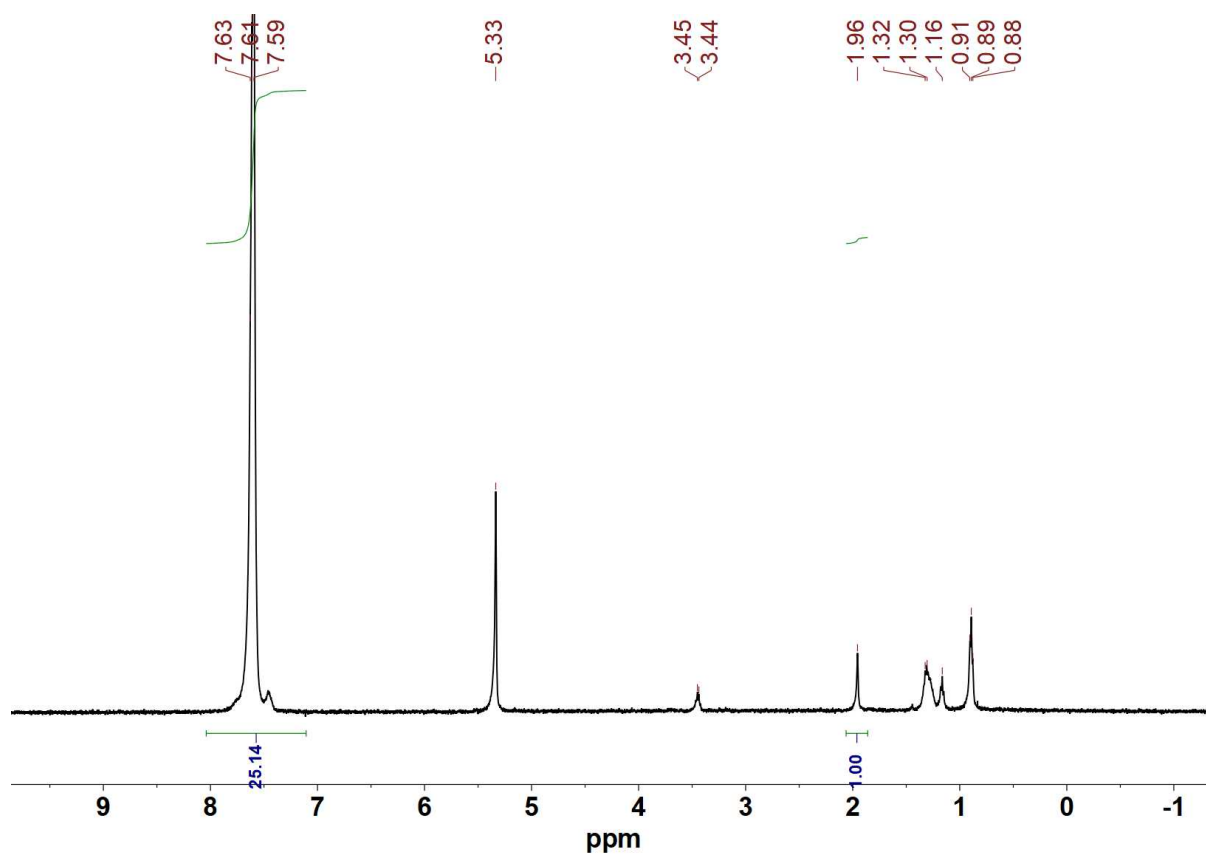

**Figure S12.**  $^1\text{H}$  NMR spectrum of  $[\text{Fe}_2(\mu\text{-SH})(\text{CO})_6(\text{PPh}_3)_2]\text{OTf}$  ( $[\text{H4}]\text{OTf}$ ) in  $\text{CD}_2\text{Cl}_2$  solution.  
*Assignment:* diethyl ether ( $\delta$  3.44, 1.16), pentane ( $\delta$  1.32, 0.89).

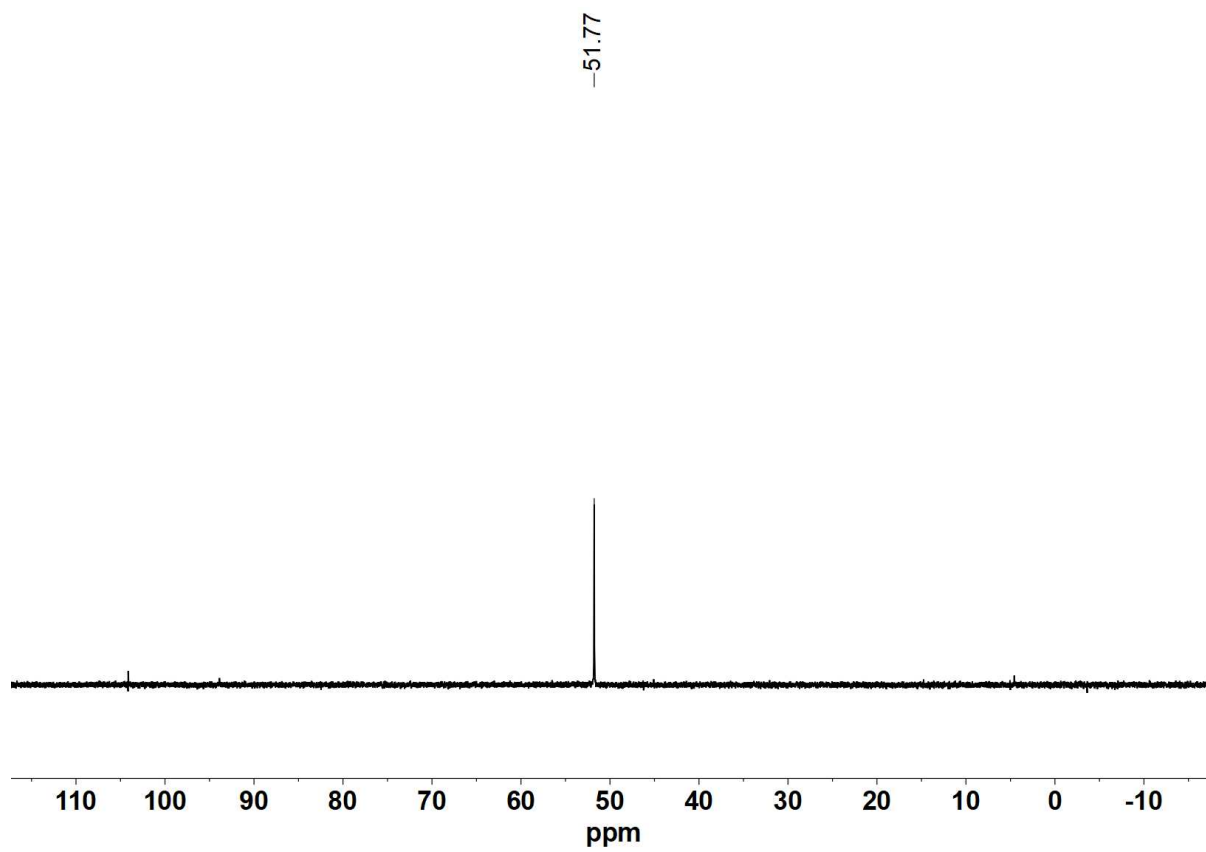

**Figure S13.**  $^{31}\text{P}$  NMR spectrum of  $[\text{Fe}_2(\mu\text{-SH})(\text{CO})_6(\text{PPh}_3)_2]\text{OTf}$  ( $[\text{H}_4]\text{OTf}$ ) in  $\text{CD}_2\text{Cl}_2$  solution.

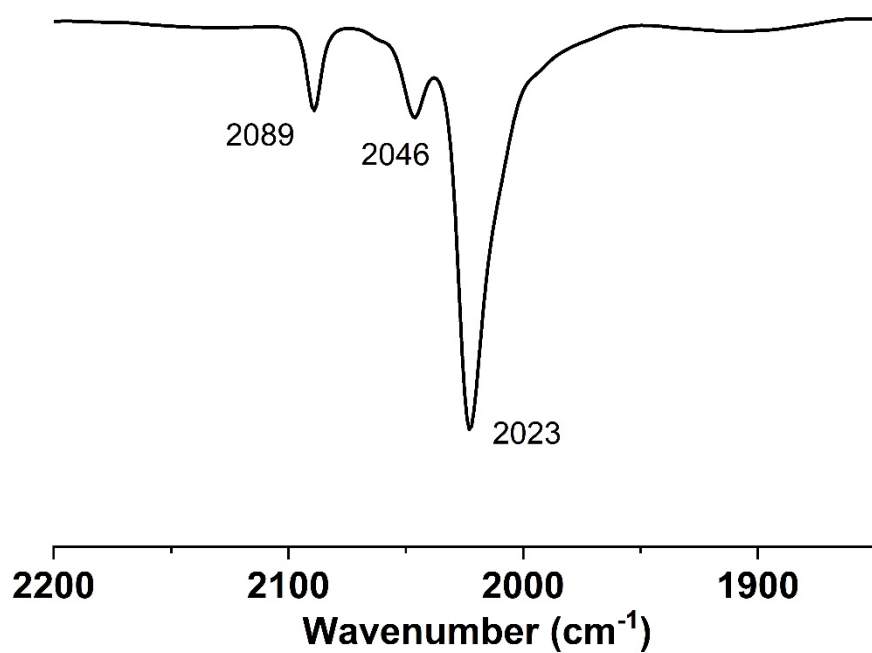

**Figure S14.** IR spectrum of  $[\text{Fe}_2(\mu\text{-SH})(\text{CO})_6(\text{PPh}_3)_2]\text{OTf}$  ( $[\text{H}_4]\text{OTf}$ ) in  $\text{CH}_2\text{Cl}_2$  solution.

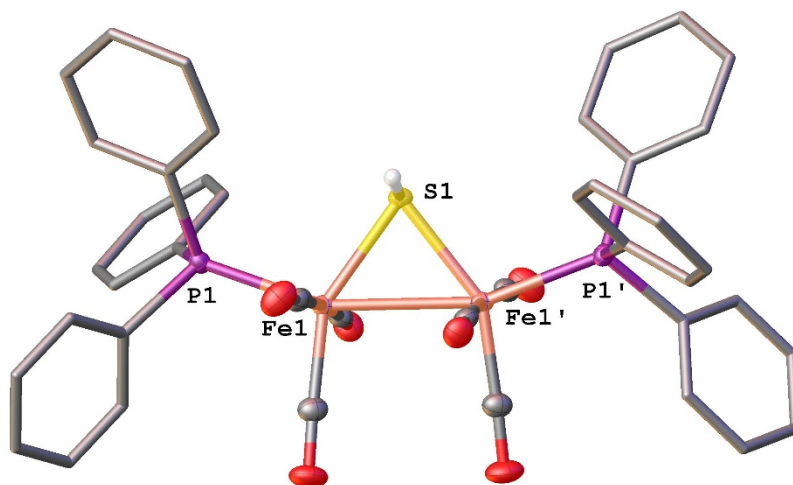

**Figure S15.** ORTEP of the  $[\text{Fe}_2(\mu\text{-SH})(\text{CO})_6(\text{PPh}_3)_2]\text{OTf}$  ( $[\text{H4}]\text{OTf}$ ). Thermal ellipsoids are drawn at 50% probability. The anion  $\text{CF}_3\text{SO}_3^-$  and hydrogen atoms except for SH are omitted for clarity. Selected bond lengths ( $\text{\AA}$ ): Fe1-Fe1', 2.7089(10); Fe1-S1, 2.2612(11); Fe1-P1, 2.2701(10). Selected angles ( $^\circ$ ): Fe1-S1-Fe1', 73.59(4); S1-Fe1-Fe1', 53.20(2).

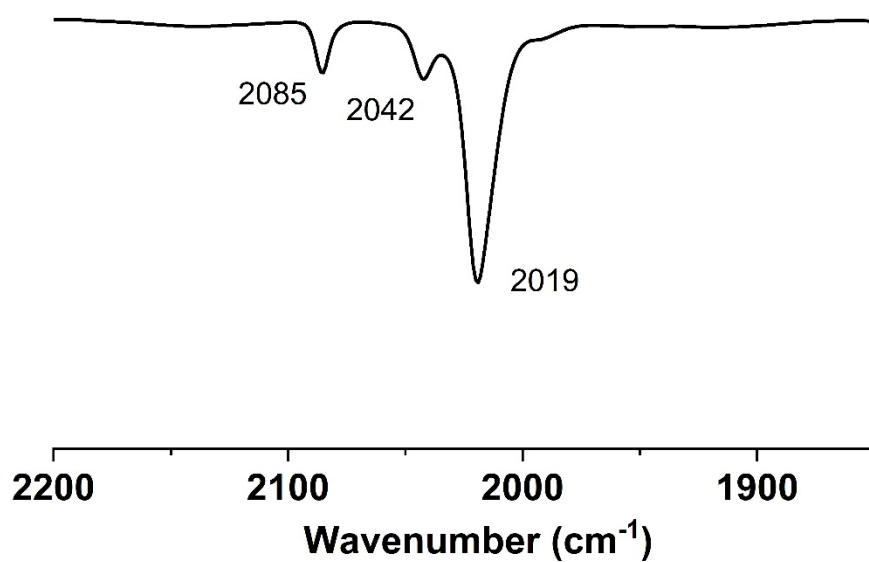

**Figure S16.** IR spectrum of  $[\text{Fe}_2(\mu\text{-SMe})(\text{CO})_6(\text{PPh}_3)_2]\text{OTf}$  (**[Me4]OTf**) in  $\text{CH}_2\text{Cl}_2$  solution.

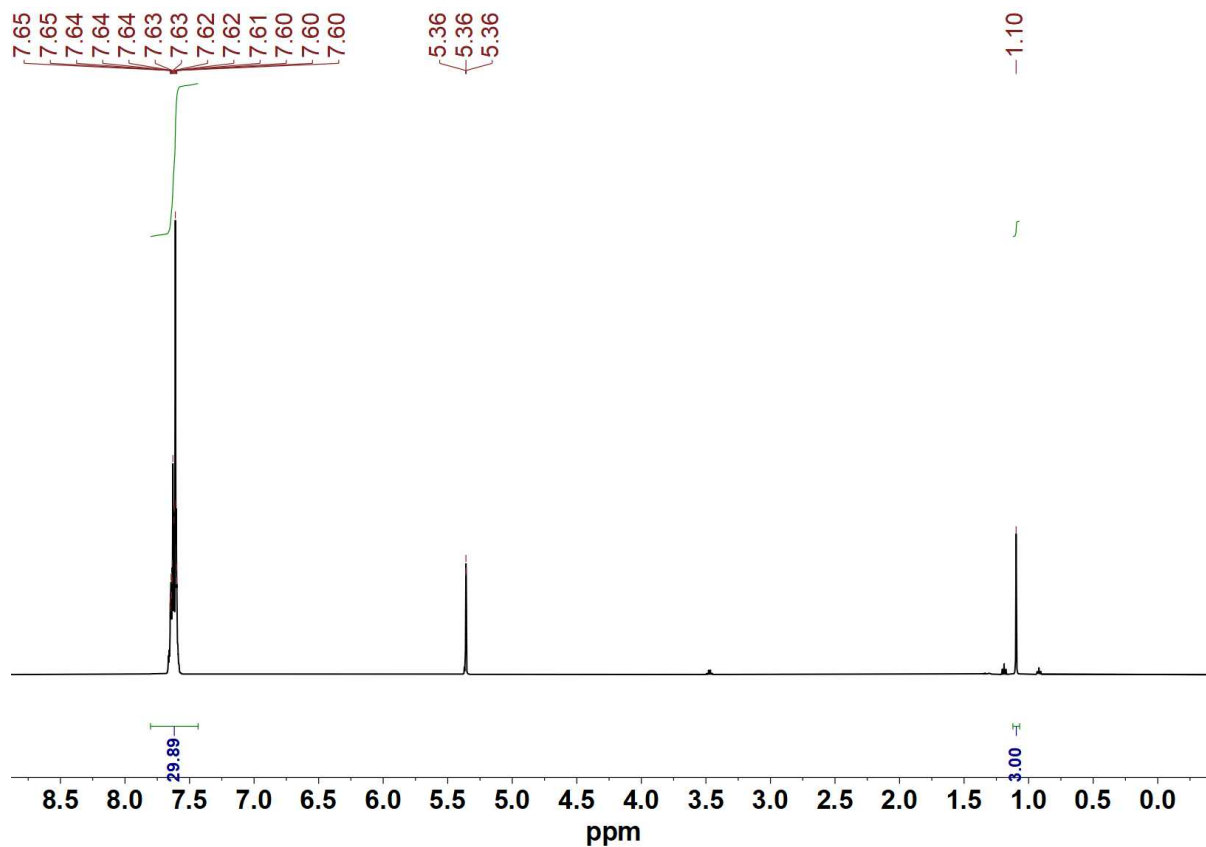

**Figure S17.**  $^1\text{H}$  NMR spectrum of  $[\text{Fe}_2(\mu\text{-SMe})(\text{CO})_6(\text{PPh}_3)_2]\text{OTf}$  ( $[\text{Me}_4]\text{OTf}$ ) in  $\text{CD}_2\text{Cl}_2$  solution.

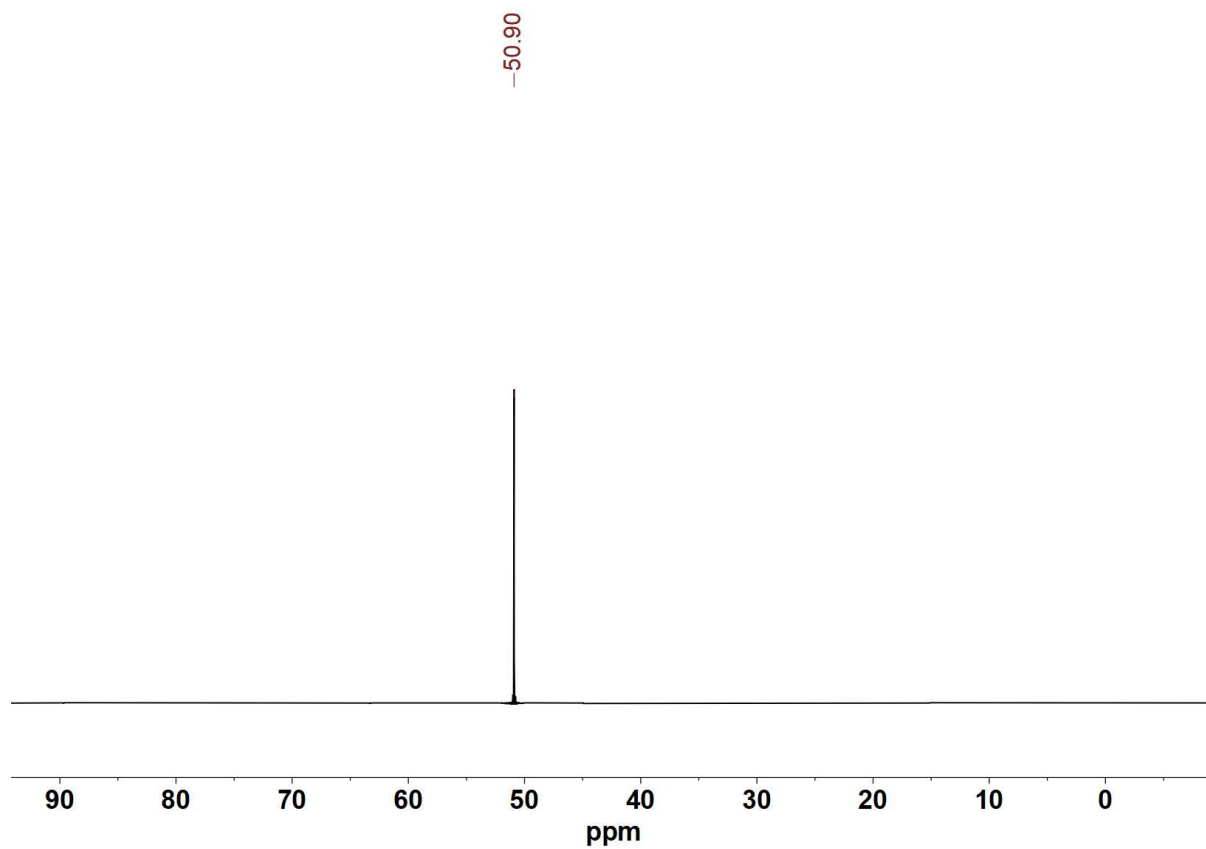

**Figure S18.**  $^{31}\text{P}$  NMR spectrum of  $[\text{Fe}_2(\mu\text{-SMe})(\text{CO})_6(\text{PPh}_3)_2]\text{OTf}$  (**[Me4]OTf**) in  $\text{CD}_2\text{Cl}_2$  solution.

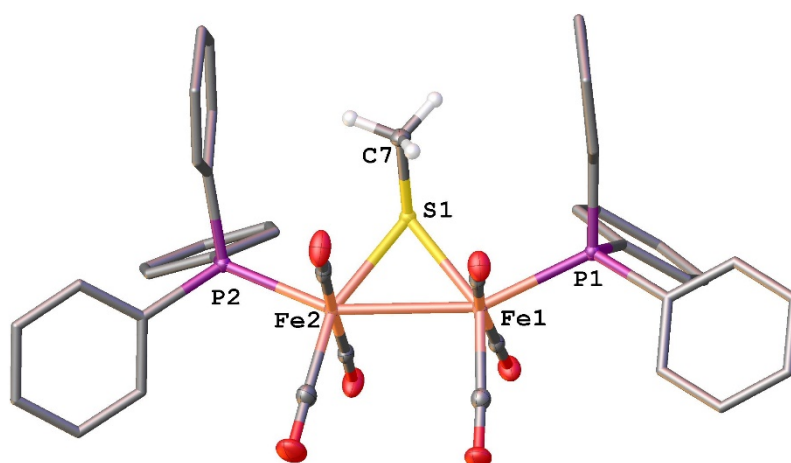

**Figure S19.** ORTEP of the [Fe<sub>2</sub>(μ-SMe)(CO)<sub>6</sub>(PPh<sub>3</sub>)<sub>2</sub>]OTf ([Me<sub>4</sub>]OTf). Thermal ellipsoids are drawn at 50% probability. The anion CF<sub>3</sub>SO<sub>3</sub><sup>-</sup> and hydrogen atoms except for CH<sub>3</sub> are omitted for clarity. Selected bond lengths (Å): Fe1-Fe2, 2.7074(2); Fe1-S1, 2.2558(3); Fe2-S1, 2.2614(3); S1-C7, 1.8221(12); Fe1-P1, 2.2909(3); Fe2-P2 2.2719(3). Selected angles (°): Fe1-S1-Fe2, 73.646(10); S1-Fe1-Fe2, 53.272(8); S1-Fe2-Fe1, 53.082(8).



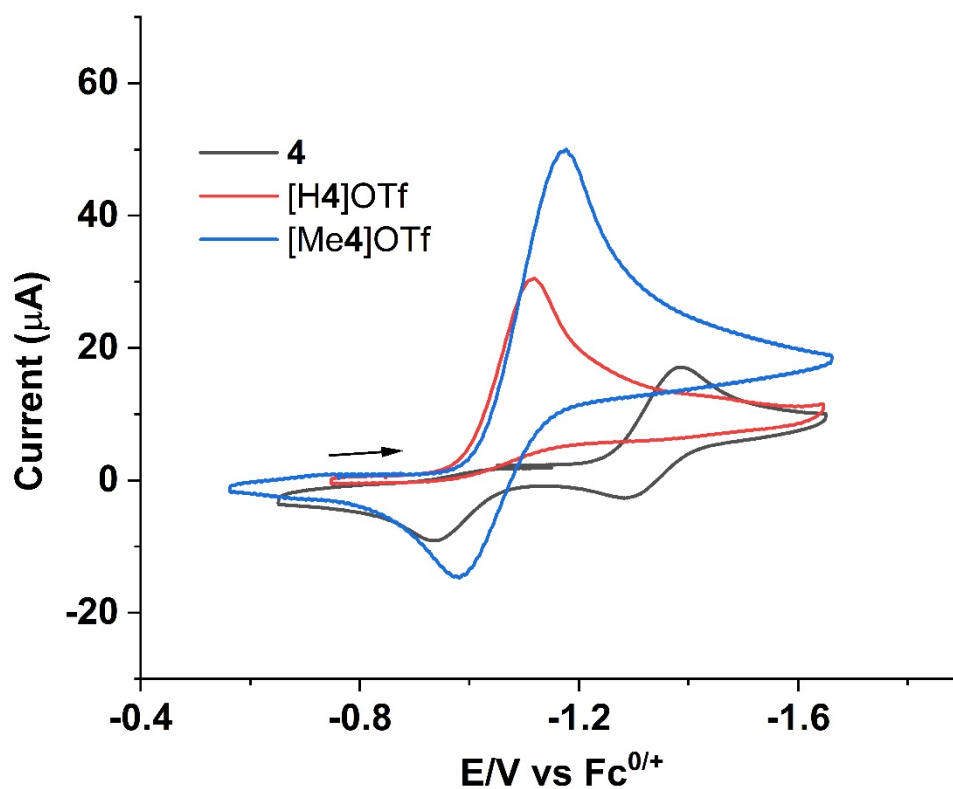

**Figure S20.** Cyclic voltammogram of **4**, [H4]OTf and [Me4]OTf. Conditions: 1.0 mM in CH<sub>2</sub>Cl<sub>2</sub>, 0.1 M Bu<sub>4</sub>NPF<sub>6</sub>, scan rate 200 mV/s, glassy carbon working electrode (*d* = 3.0 mm), Ag wire pseudoreference electrode with internal Fc standard, and Pt wire counter electrode.

### III. Crystallography

CCDC number for  $\text{Fe}_2(\mu\text{-S})(\text{CO})_6(\text{PPh}_3)_2$ : 2063553;

$[\text{Fe}_2(\mu\text{-SH})(\text{CO})_6(\text{PPh}_3)_2]\text{OTf}$ : 2063552;

$[\text{Fe}_2(\mu\text{-SMe})(\text{CO})_6(\text{PPh}_3)_2]\text{OTf}$ : 2063554.

Intensity data were collected on a Bruker D8 Venture kappa diffractometer equipped with a Photon-II CPAD detector. An  $1\ \mu\text{s}$  microfocus Mo source ( $\lambda = 0.71073\ \text{\AA}$ ) coupled with a multi-layer mirror monochromator provided the incident beam. The sample was mounted on a 0.3 mm nylon loop with the minimal amount of Paratone-N oil. Data was collected as a series of  $\varphi$  and/or  $\omega$  scans. Data was collected at 100 K using a cold stream of  $\text{N}_{2(g)}$ . The collection, cell refinement, and integration of intensity data was carried out with the APEX3 software.<sup>1</sup> A multi-scan absorption correction was performed with SADABS.<sup>2</sup> The structure was phased with intrinsic phasing methods using SHELXT<sup>3</sup> and refined with the full-matrix least-squares program SHELXL.<sup>4</sup>

(1) Bruker (2018). APEX3. Bruker AXS, Inc., Madison, Wisconsin, USA.

(2) Krause, L., Herbst-Irmer, R., Sheldrick, G. M. and Stalke, D. *J. Appl. Cryst.*, 2015, 48, 3-10.

(3) Sheldrick, G. M. *Acta Cryst.* 2015, A71, 3-8.

(4) Sheldrick, G. M. *Acta Cryst.* 2015, C71, 3-8.

## IV. DFT Calculation

Relative free energies (**bold values**) in kcal/mol,  $\nu_{\text{CO}}$  in  $\text{cm}^{-1}$ .

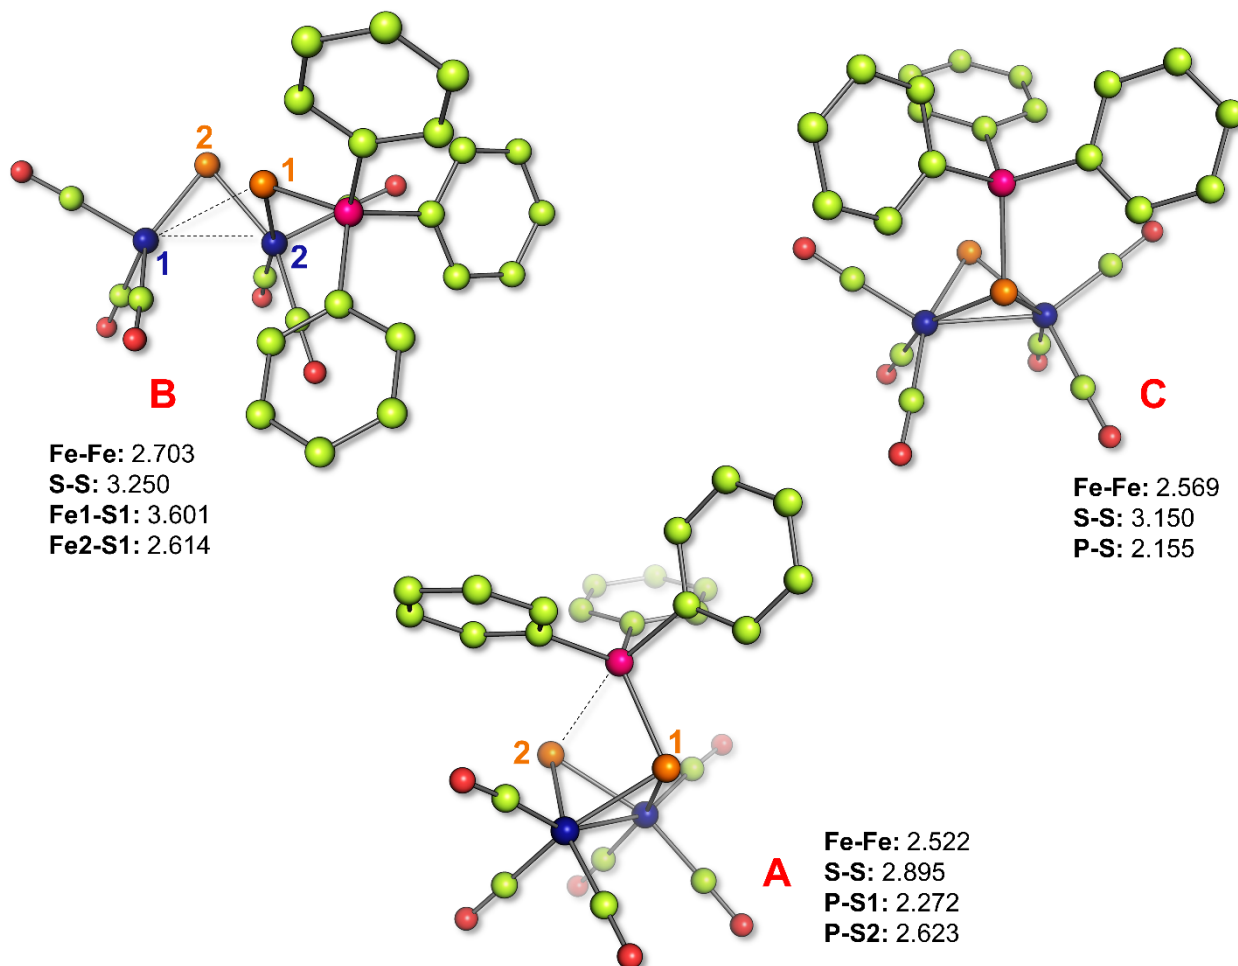

Optimized structures of structures A, B and C (see above). Selected distances in Å.

## Computational details

DFT calculations were carried out with the TURBOMOLE 7.2.1 suite of programs.<sup>1</sup> The scheme BP86<sup>2,3</sup>/def-TZVP<sup>4</sup> was chosen, since it proved suited for the modelling of the electronic structure of multi-iron complexes bearing carbonyl and/or phosphine ligands.<sup>5-7</sup> The D3 correction<sup>8</sup> was added to calculations, to accurately account for dispersion forces. The implicit solvent model COSMO (COnductor-like Screening Model)<sup>9,10</sup> was used, setting the value of  $\epsilon$  at 7.58 (for THF). Calculations were accelerated thanks to the Resolution-of-Identity approximation (RI).<sup>11</sup> Each optimized structure was characterized as pure minimum with a full vibrational analysis. The latter also allowed us to evaluate the partition function  $Q$ , calculated as the product  $Q_{\text{translational}}$ ,  $Q_{\text{rotational}}$ ,  $Q_{\text{vibrational}}$ , and thus to correct SCF energies with thermal and entropic contributions, in order to calculate free energies ( $G$ ) at  $p=1$  bar and  $T=298.15\text{K}$ .

## Reference:

1. Ahlrichs, R.; Bär, M.; Häser, M.; Horn, H.; Kölmel, C. Electronic structure calculations on workstation computers: The program system Turbomole. *Chem. Phys. Lett.* 1989, 162, 165-169.
2. Becke, A. D. Density-functional exchange-energy approximation with correct asymptotic behavior. *Phys. Rev. A: At., Mol., Opt. Phys.* 1988, 38, 3098–3100.
3. Perdew, J. P. Density-functional approximation for the correlation energy of the inhomogeneous electron gas. *Phys. Rev. B: Condens. Matter Mater. Phys.* 1986, 33, 8822–8824
4. Schäfer, A.; Huber, C.; Ahlrichs, R. Fully optimized contracted Gaussian basis sets of triple zeta valence quality for atoms Li to Kr. *J. Chem. Phys.* 1994, 100, 5829-5835.
5. Sicolo, S; Bruschi, M; Bertini, L; Zampella, G; Filippi, G; Arrigoni, F.; De Gioia, L; Greco, C. Towards biomimetic models of the reduced [FeFe]-hydrogenase that preserve the key structural features of the enzyme active site; A DFT investigation. *Int. J. Hydrog. Energy*, 2014, 39, 18565-18573.
6. Arrigoni, F; Rizza, F.; Vertemara, J.; Breglia, R.; Greco, C.; Bertini, L.; Zampella, G.; De Gioia, L.; Rational Design of  $\text{Fe}_2(\mu\text{-PR}_2)_2(\text{L})_6$  Coordination Compounds Featuring Tailored Potential Inversion. *ChemPhysChem*, 2020, 21, 2279-2292.
7. Arrigoni, F.; Bouh, S. M.; Elleouet, C.; Pétilion, F. Y.; Schollhammer, P.; De Gioia, L.; Zampella, G. Electrochemical and Theoretical Investigations of the Oxidatively Induced Reactivity of the Complex  $[\text{Fe}_2(\text{CO})_4(\kappa^2\text{-dmpe})(\mu\text{-adtBn})]$  Related to the

Active Site of [FeFe] Hydrogenases. *Chem. Eur. J.* 2018, 24, 15036-1505.

8. Grimme, S.; Antony, J.; Ehrlich, S.; Krieg, H. A consistent and accurate ab initio parametrization of density functional dispersion correction (DFT-D) for the 94 elements H-Pu. *J. Chem. Phys.* 2010, 132, 154104.

9. Klamt, A. Conductor-like screening model for real solvents: a new approach to the quantitative calculation of solvation phenomena. *J. Phys. Chem.* 1995, 99, 2224–2235.

10. Klamt, A. Calculation of UV/Vis spectra in solution. *J. Phys. Chem.* 1996, 100, 3349–3353.

11. Eichkorn, K.; Weigend, F.; Treutler, O.; Ahlrichs, R. Optimized accurate auxiliary basis sets for RI-MP2 and RI-CC2 calculations for the atoms Rb to Rn. *Theor. Chem. Acc.* 1997, 97, 119-124.

**XYZ coordinates of relevant minima.**

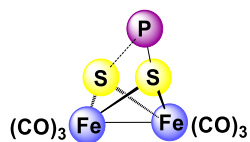

|    |           |           |           |
|----|-----------|-----------|-----------|
| Fe | -2.287734 | 0.291177  | -2.742283 |
| C  | -3.350047 | 1.701628  | -2.996156 |
| O  | -4.039469 | 2.618206  | -3.148044 |
| C  | -1.065001 | 1.131887  | -1.752982 |
| O  | -0.264426 | 1.742773  | -1.178730 |
| C  | -1.499105 | 0.490014  | -4.335556 |
| O  | -1.003379 | 0.635019  | -5.372006 |
| S  | -3.820892 | -0.502287 | -1.265207 |
| Fe | -3.884220 | -1.590706 | -3.262028 |
| C  | -5.316882 | -0.627827 | -3.701819 |
| O  | -6.250033 | -0.002731 | -3.980415 |
| S  | -1.714452 | -1.904949 | -2.671834 |
| P  | -2.051557 | -2.260537 | -0.453106 |
| C  | -0.586277 | -3.431451 | -0.183174 |
| C  | 0.288086  | -3.872922 | -1.183864 |
| C  | 1.333111  | -4.755305 | -0.877159 |
| C  | 1.510505  | -5.209965 | 0.429466  |
| C  | 0.639831  | -4.775772 | 1.437128  |
| C  | -0.394916 | -3.893063 | 1.133519  |
| C  | -3.506609 | -1.966637 | -4.970133 |
| O  | -3.278804 | -2.206118 | -6.080074 |
| C  | -4.744324 | -3.104545 | -2.867991 |
| O  | -5.353862 | -4.073331 | -2.686149 |
| C  | -1.549142 | -1.034913 | 0.844547  |
| C  | -2.471846 | -0.442410 | 1.718741  |
| C  | -2.039196 | 0.497491  | 2.654692  |
| C  | -0.695179 | 0.884830  | 2.697571  |
| C  | 0.219924  | 0.313951  | 1.811042  |
| C  | -0.200633 | -0.653121 | 0.895756  |

|   |           |           |           |
|---|-----------|-----------|-----------|
| C | -3.397037 | -3.446711 | 0.025580  |
| C | -3.204003 | -4.814397 | -0.231965 |
| C | -4.220684 | -5.731887 | 0.040429  |
| C | -5.428481 | -5.300748 | 0.592523  |
| C | -5.626651 | -3.940576 | 0.847539  |
| C | -4.627957 | -3.015189 | 0.544035  |
| H | 0.162837  | -3.534151 | -2.211514 |
| H | 2.006185  | -5.085016 | -1.670178 |
| H | 2.323157  | -5.898518 | 0.666221  |
| H | 0.768999  | -5.124762 | 2.462985  |
| H | -1.064568 | -3.558654 | 1.927975  |
| H | -3.526107 | -0.709033 | 1.679163  |
| H | -2.759910 | 0.939529  | 3.344266  |
| H | -0.366009 | 1.635840  | 3.417261  |
| H | 1.265884  | 0.622273  | 1.824023  |
| H | 0.523754  | -1.105704 | 0.218041  |
| H | -2.262946 | -5.167503 | -0.651911 |
| H | -4.064816 | -6.787813 | -0.184826 |
| H | -6.221138 | -6.019071 | 0.806573  |
| H | -6.573398 | -3.591300 | 1.261672  |
| H | -4.830077 | -1.953727 | 0.678297  |

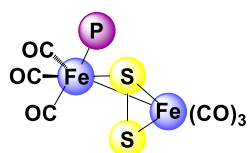

|    |           |          |           |
|----|-----------|----------|-----------|
| Fe | 1.004313  | 3.613488 | -0.765252 |
| S  | 2.616971  | 2.782643 | 0.782427  |
| S  | 1.373068  | 4.399271 | 1.262846  |
| C  | 0.091447  | 7.088066 | 2.352686  |
| C  | -0.713846 | 6.848193 | 1.224077  |
| C  | -0.626417 | 7.697832 | 0.114249  |
| C  | 0.258490  | 8.779810 | 0.135443  |
| C  | 1.051804  | 9.020782 | 1.260028  |
| C  | 0.963261  | 8.176247 | 2.371906  |
| Fe | -0.715301 | 3.364169 | 1.575312  |
| P  | -1.817510 | 5.372326 | 1.265592  |

|   |           |          |           |
|---|-----------|----------|-----------|
| C | -2.910725 | 5.517928 | -0.219830 |
| C | -3.797267 | 6.603179 | -0.328087 |
| C | -4.621440 | 6.721818 | -1.447387 |
| C | -4.579689 | 5.753247 | -2.457072 |
| C | -3.708365 | 4.667945 | -2.345745 |
| C | -2.875415 | 4.552025 | -1.231182 |
| C | 0.184391  | 4.907500 | -1.645145 |
| O | -0.233371 | 5.748501 | -2.330797 |
| C | 2.385205  | 3.760162 | -1.873568 |
| O | 3.278042  | 3.842570 | -2.606589 |
| C | 0.170075  | 2.181845 | -1.447832 |
| O | -0.389624 | 1.295839 | -1.945453 |
| C | 0.002503  | 1.702261 | 1.668572  |
| O | 0.268850  | 0.585804 | 1.793414  |
| C | -0.828112 | 3.524897 | 3.344497  |
| O | -0.888963 | 3.577327 | 4.501333  |
| C | -2.216082 | 2.539603 | 1.088439  |
| O | -3.172664 | 1.939752 | 0.815726  |
| C | -2.999716 | 5.781558 | 2.638528  |
| C | -3.141537 | 7.091724 | 3.121589  |
| C | -4.087720 | 7.376918 | 4.110814  |
| C | -4.898764 | 6.360966 | 4.623268  |
| C | -4.762095 | 5.054760 | 4.142347  |
| C | -3.817968 | 4.765848 | 3.156015  |
| H | -2.508871 | 7.890388 | 2.733609  |
| H | -4.185790 | 8.397978 | 4.483256  |
| H | -5.633155 | 6.584368 | 5.398601  |
| H | -5.386991 | 4.254268 | 4.540666  |
| H | -3.713181 | 3.741884 | 2.798310  |
| H | -1.237873 | 7.514252 | -0.767691 |
| H | 0.328201  | 9.433017 | -0.735644 |
| H | 1.743390  | 9.864638 | 1.269703  |
| H | 1.584232  | 8.356089 | 3.250447  |
| H | 0.027058  | 6.427054 | 3.219454  |
| H | -3.848522 | 7.352539 | 0.463467  |
| H | -5.304272 | 7.569146 | -1.527531 |
| H | -5.229509 | 5.845207 | -3.328850 |
| H | -3.669794 | 3.907941 | -3.127222 |
| H | -2.177741 | 3.718129 | -1.153113 |



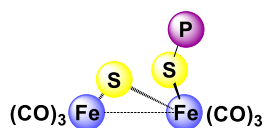

|    |           |           |           |
|----|-----------|-----------|-----------|
| S  | -3.052804 | -0.008160 | -0.794522 |
| Fe | -3.477927 | -0.886348 | -2.854822 |
| S  | -1.197750 | -2.099572 | -2.452797 |
| P  | -1.054166 | -3.715597 | -3.690747 |
| C  | -0.536350 | -3.288533 | -5.401354 |
| C  | -0.447891 | -4.292553 | -6.379987 |
| C  | -0.002854 | -3.968554 | -7.661695 |
| C  | 0.355140  | -2.649312 | -7.966950 |
| C  | 0.266419  | -1.654447 | -6.990156 |
| C  | -0.176669 | -1.971905 | -5.703732 |
| Fe | -2.269977 | 1.419433  | -2.124600 |
| C  | -1.315132 | 1.248527  | -3.611263 |
| O  | -0.646303 | 1.157122  | -4.559766 |
| C  | -3.315233 | -1.055653 | -4.626359 |
| O  | -3.258699 | -1.167462 | -5.781504 |
| C  | -4.835789 | 0.209171  | -3.021705 |
| O  | -5.770951 | 0.885752  | -3.142741 |
| C  | -4.461409 | -2.307778 | -2.397955 |
| O  | -5.180385 | -3.170414 | -2.111327 |
| C  | 0.236845  | -4.867872 | -3.063783 |
| C  | 0.212745  | -6.222924 | -3.430667 |
| C  | 1.238251  | -7.073378 | -3.011373 |
| C  | 2.288228  | -6.576445 | -2.232479 |
| C  | 2.310422  | -5.226590 | -1.867758 |
| C  | 1.286644  | -4.369864 | -2.279336 |
| C  | -2.601085 | -4.684725 | -3.818701 |
| C  | -2.961744 | -5.523036 | -2.751452 |
| C  | -4.172633 | -6.213401 | -2.793705 |
| C  | -5.030160 | -6.058865 | -3.888383 |
| C  | -4.677442 | -5.211323 | -4.942310 |
| C  | -3.463175 | -4.520683 | -4.913335 |
| C  | -3.102552 | 2.848568  | -2.743369 |

|   |           |           |           |
|---|-----------|-----------|-----------|
| O | -3.695617 | 3.783946  | -3.089705 |
| C | -1.204959 | 2.308532  | -1.011288 |
| O | -0.477177 | 2.889567  | -0.321048 |
| H | -0.731470 | -5.320027 | -6.147261 |
| H | 0.065441  | -4.746440 | -8.423854 |
| H | 0.704307  | -2.400104 | -8.970386 |
| H | 0.535515  | -0.623771 | -7.223013 |
| H | -0.252310 | -1.198432 | -4.939620 |
| H | -0.611329 | -6.619821 | -4.025228 |
| H | 1.213684  | -8.127495 | -3.291770 |
| H | 3.088074  | -7.243437 | -1.907116 |
| H | 3.125418  | -4.836984 | -1.256337 |
| H | 1.297097  | -3.318197 | -1.987267 |
| H | -3.191972 | -3.855119 | -5.732833 |
| H | -5.351571 | -5.080296 | -5.789444 |
| H | -5.981723 | -6.591522 | -3.912638 |
| H | -4.455066 | -6.860994 | -1.962980 |
| H | -2.300053 | -5.628236 | -1.890695 |

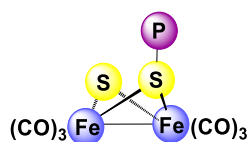

|    |           |           |           |
|----|-----------|-----------|-----------|
| Fe | -1.900019 | 0.053165  | -2.894661 |
| C  | -2.415201 | 1.676334  | -3.419749 |
| O  | -2.727551 | 2.736403  | -3.764304 |
| C  | -0.479669 | 0.532156  | -1.939886 |
| O  | 0.431501  | 0.858951  | -1.297812 |
| C  | -1.150938 | -0.321479 | -4.474363 |
| O  | -0.655243 | -0.502930 | -5.507934 |
| S  | -3.486570 | 0.422622  | -1.277939 |
| Fe | -4.197159 | -1.080038 | -2.850706 |
| C  | -5.179327 | 0.324450  | -3.324939 |
| O  | -5.842583 | 1.216632  | -3.648596 |
| S  | -2.220313 | -2.155390 | -2.505992 |
| P  | -1.907093 | -2.692732 | -0.424370 |
| C  | -2.348659 | -4.472841 | -0.379299 |

|   |           |           |           |
|---|-----------|-----------|-----------|
| C | -1.610574 | -5.365293 | 0.412621  |
| C | -1.993204 | -6.706740 | 0.483372  |
| C | -3.107191 | -7.159627 | -0.230075 |
| C | -3.839832 | -6.269911 | -1.022219 |
| C | -3.463374 | -4.928021 | -1.102971 |
| C | -4.356032 | -1.867435 | -4.448968 |
| O | -4.508889 | -2.339827 | -5.497491 |
| C | -5.437854 | -1.939980 | -1.918412 |
| O | -6.249630 | -2.507195 | -1.308810 |
| C | -0.119536 | -2.550804 | -0.060583 |
| C | 0.333555  | -2.573593 | 1.270492  |
| C | 1.702914  | -2.522792 | 1.536950  |
| C | 2.620474  | -2.445576 | 0.484161  |
| C | 2.169110  | -2.425717 | -0.838557 |
| C | 0.802340  | -2.481393 | -1.115917 |
| C | -2.826254 | -1.895565 | 0.933861  |
| C | -2.308975 | -0.745532 | 1.559269  |
| C | -3.034502 | -0.132171 | 2.574811  |
| C | -4.286750 | -0.639183 | 2.952404  |
| C | -4.799080 | -1.777047 | 2.326940  |
| C | -4.066053 | -2.420808 | 1.325452  |
| H | -0.735124 | -5.020285 | 0.963569  |
| H | -1.414592 | -7.399647 | 1.095860  |
| H | -3.402177 | -8.208435 | -0.172039 |
| H | -4.705926 | -6.619407 | -1.585745 |
| H | -4.028804 | -4.240990 | -1.732763 |
| H | -0.379434 | -2.620732 | 2.094553  |
| H | 2.051480  | -2.535729 | 2.570532  |
| H | 3.689540  | -2.395797 | 0.696122  |
| H | 2.881616  | -2.355932 | -1.661143 |
| H | 0.454330  | -2.450140 | -2.148600 |
| H | -1.364279 | -0.316461 | 1.226031  |
| H | -2.636823 | 0.762603  | 3.055026  |
| H | -4.862004 | -0.140716 | 3.733850  |
| H | -5.773897 | -2.171765 | 2.615992  |
| H | -4.471505 | -3.311700 | 0.847035  |

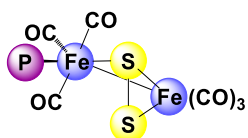

|    |           |           |           |
|----|-----------|-----------|-----------|
| C  | 0.175459  | -0.116852 | 0.162256  |
| O  | 0.135181  | -0.170309 | 1.316914  |
| Fe | 0.239423  | -0.062515 | -1.620950 |
| C  | 1.473717  | -1.331738 | -1.868000 |
| O  | 2.315354  | -2.124807 | -1.960807 |
| S  | -1.726738 | 0.736709  | -2.284445 |
| Fe | -0.619197 | 0.387517  | -4.254729 |
| C  | 0.845005  | -0.443523 | -4.865189 |
| O  | 1.806743  | -0.924652 | -5.302945 |
| S  | -1.805182 | -1.232279 | -1.547050 |
| C  | 1.403548  | 1.284834  | -1.566131 |
| O  | 2.195823  | 2.116867  | -1.415049 |
| C  | 0.229825  | 1.941387  | -4.058320 |
| O  | 0.742250  | 2.980003  | -4.057066 |
| C  | -1.415442 | 1.187056  | -5.634385 |
| O  | -1.848676 | 1.803349  | -6.518595 |
| P  | -1.981055 | -1.489128 | -4.871829 |
| C  | -2.214118 | -1.492981 | -6.728863 |
| C  | -1.448330 | -3.257436 | -4.644057 |
| C  | -3.724605 | -1.410524 | -4.232138 |
| C  | -4.422770 | -0.193548 | -4.310321 |
| C  | -5.743090 | -0.106313 | -3.860554 |
| C  | -6.374332 | -1.227082 | -3.313827 |
| C  | -5.679606 | -2.436293 | -3.221647 |
| C  | -4.361862 | -2.530495 | -3.677879 |
| H  | -3.939876 | 0.693886  | -4.721197 |
| H  | -6.273604 | 0.844767  | -3.929496 |
| H  | -7.402123 | -1.156477 | -2.954290 |
| H  | -6.160548 | -3.313045 | -2.784595 |
| H  | -3.825487 | -3.474826 | -3.588678 |
| C  | -3.462506 | -1.314637 | -7.341094 |
| C  | -3.574170 | -1.335443 | -8.736410 |
| C  | -2.444551 | -1.535448 | -9.531726 |
| C  | -1.196211 | -1.717551 | -8.926710 |

|   |           |           |            |
|---|-----------|-----------|------------|
| C | -1.080468 | -1.694863 | -7.536393  |
| H | -4.354944 | -1.162342 | -6.734444  |
| H | -4.552702 | -1.194357 | -9.198869  |
| H | -2.534150 | -1.550488 | -10.619150 |
| H | -0.306921 | -1.876984 | -9.538756  |
| H | -0.100619 | -1.849956 | -7.082522  |
| C | -2.044799 | -4.267929 | -5.420427  |
| C | -1.646474 | -5.597836 | -5.266228  |
| C | -0.638737 | -5.930010 | -4.354491  |
| C | -0.034041 | -4.927316 | -3.592584  |
| C | -0.441533 | -3.597608 | -3.734904  |
| H | -2.814682 | -4.018230 | -6.151091  |
| H | -2.119659 | -6.374780 | -5.869184  |
| H | -0.322172 | -6.968514 | -4.243821  |
| H | 0.759774  | -5.173839 | -2.886047  |
| H | 0.016290  | -2.815546 | -3.135045  |
